# Supplementary material for: Template-free syntheses of CdS microspheres composed of ultrasmall nanocrystals and their photocatalytic study
Source: Royal Society of Chemistry journal article supplement (doi:10.1039/c4ra01608d), 2014-01-01

## Electronic Supplementary Information

### Template-free Syntheses of CdS Microspheres Composed of Ultrasmall Nanocrystals and their photocatalytic study

Manjodh Kaur and C. M. Nagaraja\*

Department of Chemistry, Indian Institute of Technology Ropar, Rupnagar 140001, Punjab, India. Email: [cmnraja@iitrpr.ac.in](mailto:cmnraja@iitrpr.ac.in), Tel:+91-1881242229

Fig. S1 FT-IR Spectrum of uncapped CdS microspheres S3.

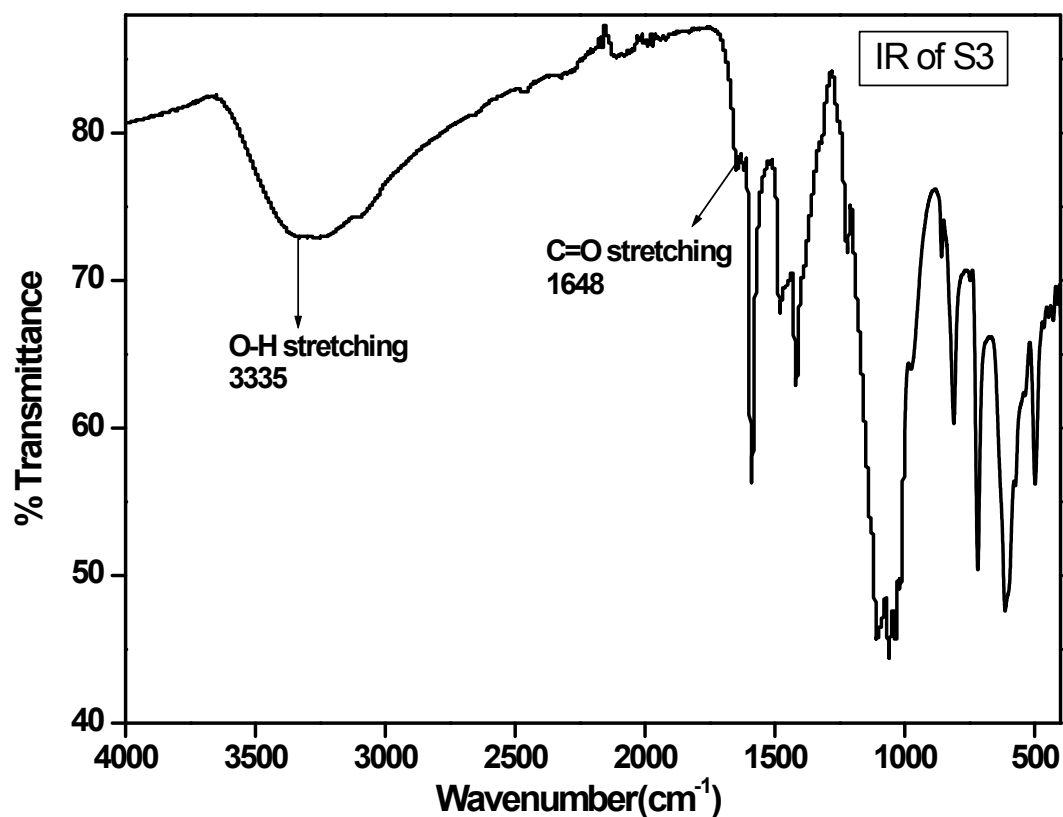

Fig. S2 FT-IR Spectrum of MCE-capped CdS microspheres S4.

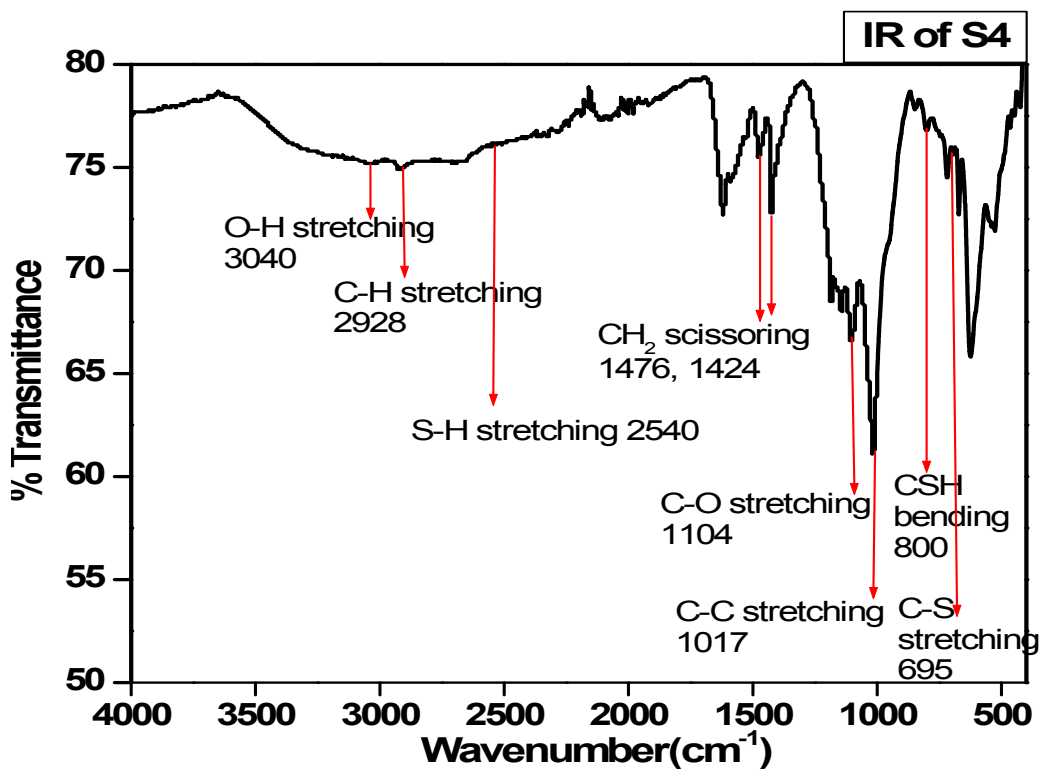

Fig. S3. Band gap calculation plot for S1.

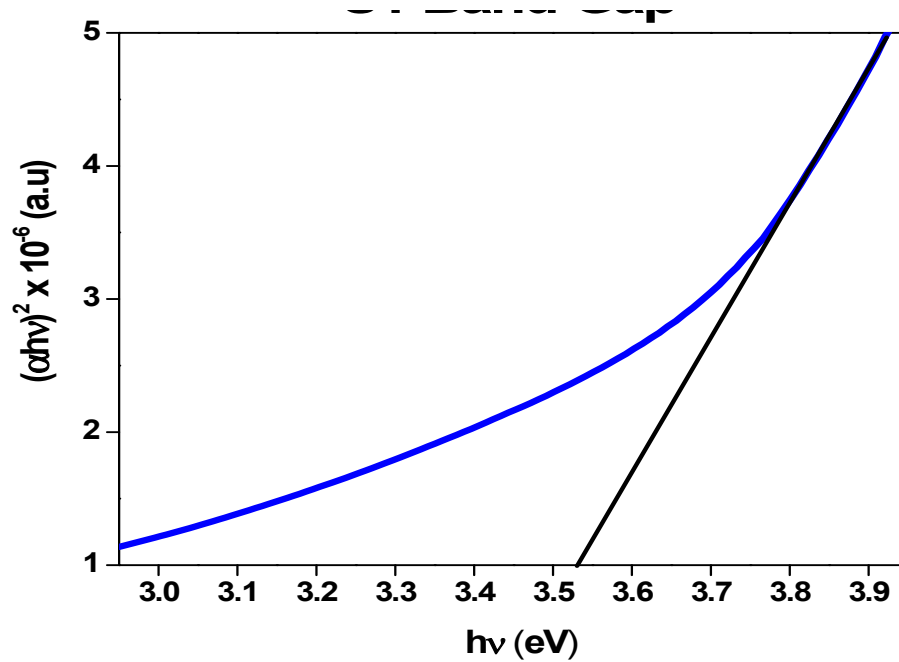

Fig. S4. Band gap calculation plot for S2.

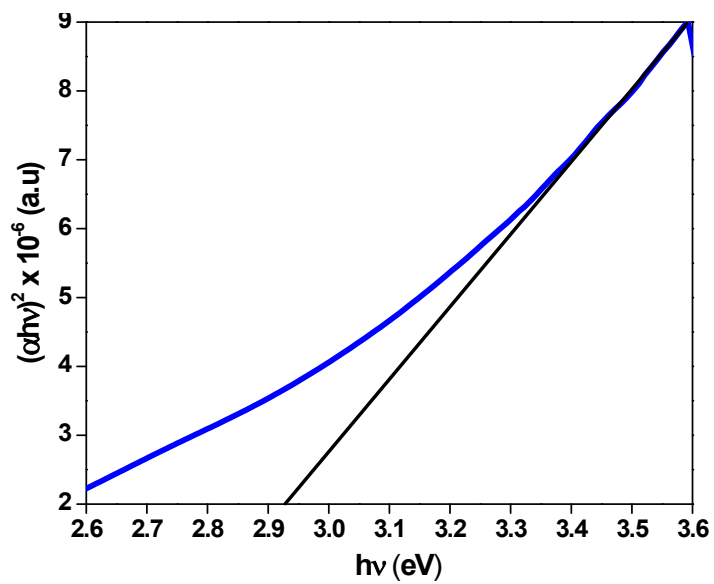

Fig. S5. Band gap calculation plot for S3.

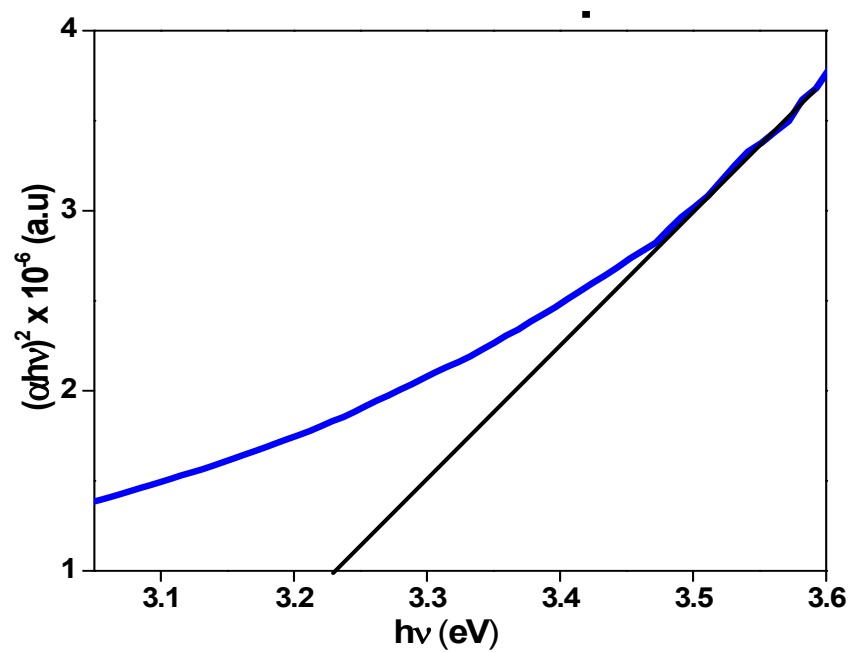

Fig. S6. Band gap calculation plot for S4.

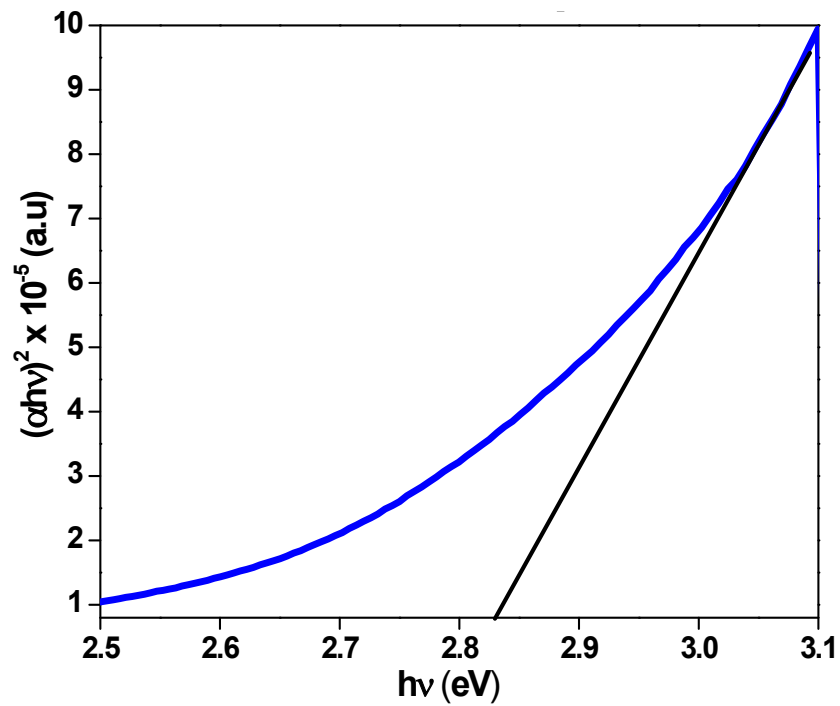

**Scheme S1.** Proposed mechanism of photocatalytic degradation of MO showing possible pathways enroute to the formation of  $\text{CO}_2$  and  $\text{H}_2\text{O}$ .

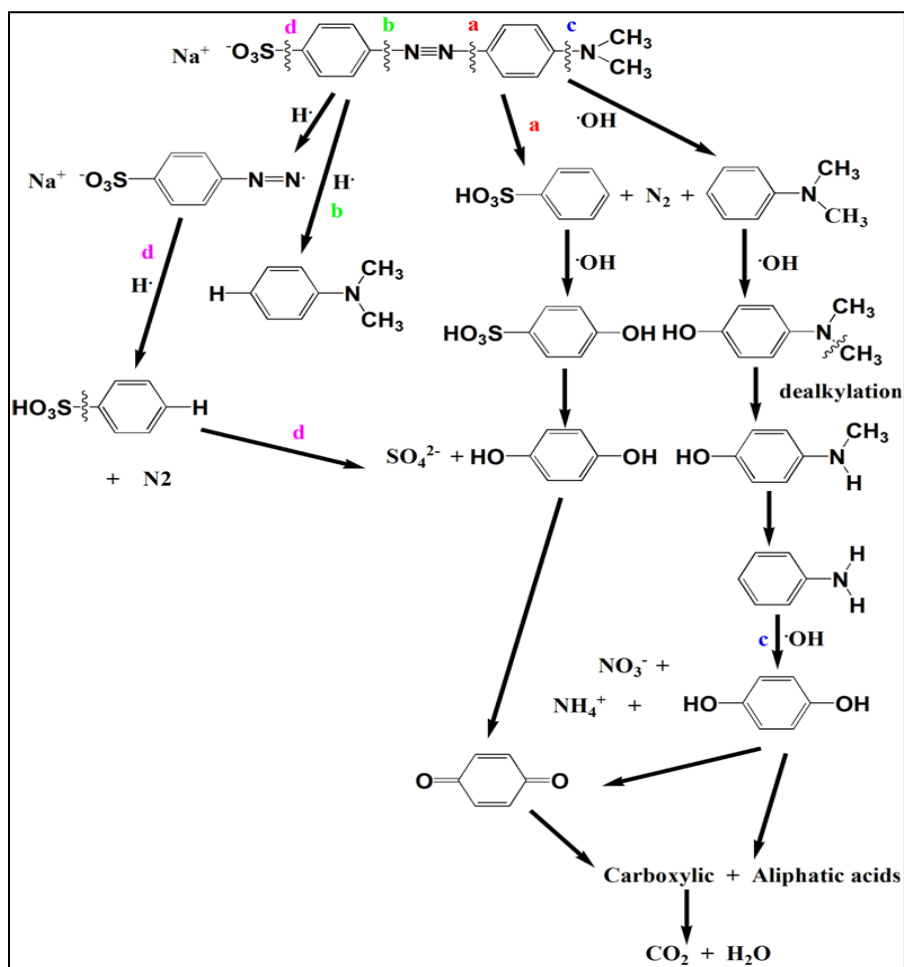

Supplement: c4ra01608d1.pdf [file c4ra01608d1.pdf]
